# Supplementary material for: An (E)-selective synthesis of trisubstituted (E)-α,β-unsaturated acid derivatives
Source: Royal Society of Chemistry journal article supplement (doi:10.1039/b304213h), 2003-01-01
Supplement: b304213h.doc [file b304213h.doc]

**Supplementary Data**

**An (*E*)-Selective Synthesis of Trisubstituted (*E*)-,-Unsaturated Acid Derivatives.**

Fred J. P. Feuillet, Diane E. J. E. Robinson and Steven D. Bull*

*Department of Chemistry, University of Bath, Claverton Down, Bath, BA2 7AY.*

***N*-2-Hydroxy-2-methyl-3-phenyl-acrylamide 3a** A solution of KHMDS (2.60ml of a 0.5M solution, 1.3 mmol) in toluene was added dropwise to a stirred solution of *syn*-aldolate **2a** (200mg, 0.87mmol) in THF (5ml) at –78˚C under nitrogen. The reaction mixture was stirred at –78˚C for two hours, before quenching with a saturated solution of NH4Claq (2 ml). The aqueous layer was extracted with CH2Cl2 (3 x 10ml), and the combined organic extracts washed with brine. The organic layer was dried over MgSO4, and the solvent removed *in vacuo* to afford the title compound (158 mg, 0.77mmol) in 89% yield. 1H NMR (300 MHz; CDCl3)1.97 (s, 3H, CH3), 2.61 (s, 1H, OH), 3.42 (dt, 2H, *J* 5.3Hz, 4.9Hz, C*H*2NH), 3.68 (t, 2H, *J* 4.9Hz, C*H*2OH), 6.24 (s, 1H, NH), 7.12 (s, 1H, CH), 7.16-7.25 (m, 5H, Ph); 13C NMR (75 MHz; CDCl3*)* 14.6, 43.3, 62.8, 128.3, 128.8, 129.7, 131.9, 134.9, 134.6, 171.2 ; HRMS m/z (EI) Found: M+, 206.1180. C12H16NO2 requires 206.1181.

**2-Methyl-3-phenyl-acrylic acid 12a**1

-Unsaturated amide **3a** (47mg, 0.23mmol) was dissolved in 6M HCl (5ml), and the resulting solution refluxed for five hours. The reaction mixture was allowed to cool to room temperature, saturated with excess sodium chloride, and extracted with EtOAc (5x10ml). The combined organic layers were dried (MgSO4) and the solvent removed *in vacuo* to afford the title compound (37 mg, 0.228mmol) in 99% yield. 1H NMR (300 MHz; CDCl3)2.08 (s, 3H, CH3), 7.26-7.36 (m, 5H, Ph), 7.77 (s, 1H, CH), 11.36 (b, 1H, COOH); 13C NMR (75MHz, CDCl3) 12.7, 126.5, 127.4, 127.7, 128.8, 134.5, 140.1, 173.4 ; HRMS m/z (EI) Found: M+, 162.0672. C10H10O requires 162.0675.

# References

1 D.Basavaiah, M. Krishnamacharyulu, R. Suguna Hyma, P. K. S. Sarma, N. Kumaragurubaran, *J. Org. Chem.*, **1999**, *64*, 1197.
